# Supplementary material for: Drivers of Consumer Preference Derived from Active Volatiles for Cooked Eriocheir sinensis
Source: MDPI journal article supplement (doi:10.3390/ani13030541), 2023-02-03
Supplement: s1 [file s1]

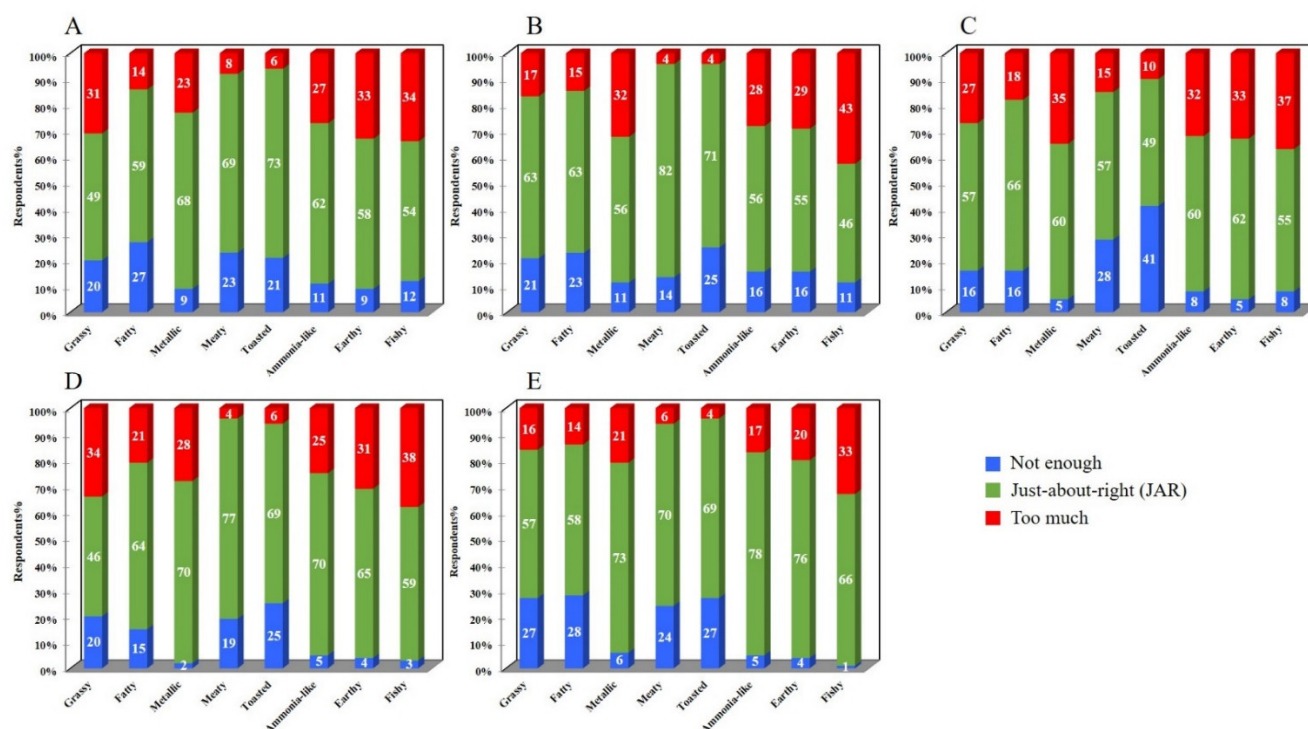

**Figure S1.** Percentage of Just-About-Right (JAR) consumers' responses on overall preference for *E. sinensis* in Shanghai (n=100) A, B, and C represent the meat, gonads, and hepatopancreas for females, respectively. D and E represent the meat and hepatopancreas for males, respectively.

**Table S1.** Sensory descriptors and definitions for each descriptor.

| No. | Descriptors  | Definitions                                                                                                             |
|-----|--------------|-------------------------------------------------------------------------------------------------------------------------|
| 1   | Grassy       | Aromatics associated with mowed lawn                                                                                    |
| 2   | Fatty        | The aromatics resulting from the natural deterioration of a food rendered fat.                                          |
| 3   | Metallic     | (1) The aromatic associated with metals, tinny or iron;<br>(2) A flat feeling factor stimulated on the tongue by metal. |
| 4   | Meaty        | Aromatics associated with cooked meat                                                                                   |
| 5   | Toasted      | Aromatics associated with baked goods, combined with caramel, sweet and milky                                           |
| 6   | Ammonia-like | Aromatics associated with ammonia, slightly irritant                                                                    |
| 7   | Earthy       | Flavor associated with soil                                                                                             |
| 8   | Fishy        | Flavor associated with cooked white fish                                                                                |

**Table S2.** Retention index, boiling points, odor types, odor descriptions, and thresholds of volatile compounds identified in meat, gonads, and hepatopancreas of *E. sinensis* from three areas.

| Code                  | RI <sup>a</sup> | Compounds              | Boiling point (°C) | Odor Type <sup>b</sup> | Odor Description <sup>c</sup>                       | Threshold <sup>c</sup> (µg/kg) |
|-----------------------|-----------------|------------------------|--------------------|------------------------|-----------------------------------------------------|--------------------------------|
| <b>Aldehydes (21)</b> |                 |                        |                    |                        |                                                     |                                |
| Q1                    | 699             | Pentanal               | 103                | Fermented              | bready, fruity, nutty                               | 9                              |
| Q2                    | 800             | Hexanal                | 129.6              | Green                  | green, grassy, fatty                                | 5                              |
| Q3                    | 901             | Heptanal               | 153                | Green                  | fresh, aldehydic, fatty                             | 2.8                            |
| Q4                    | 1004            | Octanal                | 163.4              | Aldehydic              | Fatty, pungent, waxy, citrus, orange, herbal, fresh | 0.587                          |
| Q5                    | 1104            | Nonanal                | 191                | Aldehydic              | waxy, fatty, orange                                 | 1.1                            |
| Q6                    | 1206            | Decanal                | 207-209            | Aldehydic              | sweet, waxy, citrus                                 | 0.1                            |
| Q7                    | 754             | (E)-2-Pentenal         | 126.8              | Green                  | pungent, green, fruity                              | 199.69                         |
| Q8                    | 873             | (E)-2-Hexenal          | 146-149            | Green                  | green, banana, fatty                                | 19.2                           |
| Q9                    | 854             | (E)-2-Octenal          | 84-86              | Fatty                  | fatty                                               | 3                              |
| Q10                   | 1157            | (E)-2-Nonenal          | 189                | Fatty                  | fatty, green, cucumber                              | 0.08                           |
| Q11                   | 1263            | (Z)-2-Decenal          | 229                | Fatty                  | waxy, earthy, green                                 | 0.3                            |
| Q12                   | 1193            | (Z)-4-Decenal          | 200.06             | Citrus                 | orange, aldehydic, watery                           | 0.02                           |
| Q13                   | 1365            | (E)-2-Undecenal        | 229                | Fruity                 | fruity, citrus                                      | 0.78                           |
| Q14                   | 1482            | (E)-2-Dodecenal        | 93                 | Herbal                 | citrus, metallic, mandarin                          | 1.4                            |
| Q15                   | 1012            | (E, E)-2,4-Heptadienal | 177.4              | Fatty                  | fatty, green, oily, aldehydic                       | 15.4                           |
| Q16                   | 663             | 2-methyl-Butanal       | 90-92              | Cocoa                  | musty, cocoa, coffee, nutty                         | 1                              |
| Q17                   | 670             | 3-methyl-Butanal       | 93.5               | Aldehydic              | ethereal, chocolate, fatty                          | 1.1                            |
| Q18                   | 745             | (E)-2-methyl-2-Butenal | 115                | N.A.                   | N.A.                                                | 458.9                          |
| Q19                   | 762             | 2-ethyl-Butanal        | 136.5              | Green                  | sweet, green, ethereal                              | -                              |
| Q20                   | 956             | 2-ethyl-Hexanal        | 184.6              | N.A.                   | N.A.                                                | 125                            |
| Q21                   | 1365            | 2-methyl-Undecanal     | 171                | Aldehydic              | fresh, amber, mossy, citrus                         | -                              |
| <b>Ketones (8)</b>    |                 |                        |                    |                        |                                                     |                                |
| T1                    | 573             | 2-Butanone             | 76.9               | Ethereal               | fruity, camphoreous                                 | 35400.2                        |
| T2                    | 990             | 2-Octanone             | 173.5              | Earthy                 | earthy, weedy, natural, woody                       | 50.2                           |
| T3                    | 1092            | 2-Nonanone             | 195.3              | Fruity                 | fresh, sweet, green                                 | 38.9                           |
| T4                    | 1294            | 2-Undecanone           | 228                | Fruity                 | waxy, fruity, creamy, fatty                         | 5.5                            |
| T5                    | 1396            | 2-Dodecanone           | 247.8              | Citrus                 | fatty                                               | 42                             |
| T6                    | 1497            | 2-Tridecanone          | 263                | Waxy                   | fatty, waxy, dairy, coconut                         | -                              |

|     |      |                                    |         |           |                               |         |
|-----|------|------------------------------------|---------|-----------|-------------------------------|---------|
| T7  | 986  | 6-methyl-5-Hepten-2-one            | 173.28  | Citrus    | green, musty, citrus          | 68      |
| T8  | 865  | 5-methyl-2-Hexanone                | 145     | N.A.      | N.A.                          | 62      |
|     |      | <b>Alcohols (14)</b>               |         |           |                               |         |
| C1  | 765  | 1-Pentanol                         | 136-138 | Fermented | fusel, oily, sweet            | 150.2   |
| C2  | 874  | 1-Hexanol                          | 157     | Herbal    | ethereal, fusel, oily         | 5.6     |
| C3  | 970  | 1-Heptanol                         | 176.45  | Green     | musty, leafy, violet, herbal  | 5.4     |
| C4  | 998  | 2-Octanol                          | 178     | Spicy     | fresh, spicy, green, woody    | 7.8     |
| C5  | 1102 | 2-Nonanol                          | 195.5   | Waxy      | green, creamy, citrus, orange | 58      |
| C6  | 1298 | 2-Undecanol                        | 228     | Waxy      | fresh, waxy, cloth            | 8.6     |
| C7  | 684  | 1-Penten-3-ol                      | 114-115 | Green     | ethereal, green, radish       | 358.1   |
| C8  | 725  | 3-Penten-1-ol                      | 140     | N.A.      | N.A.                          | -       |
| C9  | 767  | (Z)-2-Penten-1-ol                  | 141.3   | Green     | green, phenolic, ethereal     | 89.2    |
| C10 | 732  | 5-Hexen-2-ol                       | 139     | N.A.      | N.A.                          | -       |
| C11 | 980  | 1-Octen-3-ol                       | 175     | Earthy    | mushroom, earthy, green       | 1.5     |
| C12 | 1257 | (E)-2-Decen-1-ol                   | 230.3   | Fatty     | waxy, ozone, citrus, rose     | -       |
| C13 | 1031 | 2-ethyl-1-Hexanol                  | 183-186 | Citrus    | fresh, floral, oily           | 1500    |
| C14 | 1028 | 2-methyl-1-Hexadecanol             | 318     | N.A.      | N.A.                          | -       |
|     |      | <b>Aromatics (12)</b>              |         |           |                               |         |
| P1  | 654  | Benzene                            | 80.1    | N.A.      | N.A.                          | 3630    |
| P2  | 763  | Toluene                            | 110.6   | N.A.      | N.A.                          | 1550    |
| P3  | 855  | Ethylbenzene                       | 136.2   | N.A.      | N.A.                          | 2205.25 |
| P4  | 865  | p-Xylene                           | 138.3   | N.A.      | N.A.                          | 530     |
| P5  | 887  | o-Xylene                           | 143     | N.A.      | N.A.                          | 450.23  |
| P6  | 893  | Styrene                            | 145.2   | Balsamic  | sweet, floral, balsamic       | 65      |
| P7  | 953  | Propylbenzene                      | 160.51  | N.A.      | N.A.                          | 177.12  |
| P8  | 1054 | Butylbenzene                       | 183     | N.A.      | N.A.                          | 100     |
| P9  | 1157 | Pentylbenzene                      | 205     | N.A.      | N.A.                          | -       |
| P10 | 962  | Benzaldehyde                       | 179     | Fruity    | sweet, almond                 | 41.7    |
| P11 | 990  | 1,2,4-trimethyl-Benzene            | 168     | N.A.      | N.A.                          |         |
| P12 | 1182 | Naphthalene                        | 217.9   | Pungent   | pungent, dry, resinous        | 60      |
|     |      | <b>Furans (3)</b>                  |         |           |                               |         |
| F1  | 614  | 3-methyl-Furan                     | 65      | N.A.      | N.A.                          | -       |
| F2  | 833  | Furfural                           | 161.7   | Bready    | sweet, woody, almond          | 9562    |
| F3  | 859  | 2-Furanmethanol                    | 171     | Bready    | musty, sweet, alcoholic       | 4500.5  |
|     |      | <b>S-containing compounds (12)</b> |         |           |                               |         |

|                                   |      |                        |         |            |                                   |       |
|-----------------------------------|------|------------------------|---------|------------|-----------------------------------|-------|
| S1                                | 616  | Propyl mercaptan       | 67      | Alliaceous | cabbage, gassy, sweet, onion      | 3.1   |
| S2                                | 1233 | 1-Nonanethiol          | 219.97  | N.A.       | N.A.                              | -     |
| S3                                | 746  | Dimethyl disulfide     | 109     | Sulfurous  | vegetable, cabbage, onion         | 12,3  |
| S4                                | 824  | Dimethyl Sulfoxide     | 189     | Alliaceous | fatty, oily, cheesy               | -     |
| S5                                | 970  | Dimethyl trisulfide    | 41      | Alliaceous | meaty, onion, savory              | -     |
| S6                                | 775  | 2-methyl-Thiophene     | 107.9   | Sulfurous  | alliacious, onion, roasted, green | -     |
| S7                                | 869  | 3-ethyl-Thiophene      | 138.31  | Styrene    | styrene                           | -     |
| S8                                | 961  | 2-propyl-Thiophene     | -       | Chemical   | chemical                          | -     |
| S9                                | 1069 | 2-butyl-Thiophene      | 181     | Fruity     | floral, milky, fried, chicken     | -     |
| S10                               | 896  | 2,3-dimethyl-Thiophene | -       | N.A.       | N.A.                              | -     |
| S11                               | 735  | Thiazole               | -       | Fishy      | fishy, nutty, meaty               | 38    |
| S12                               | 1022 | 2-Acetylthiazole       | 212.5   | Popcorn    | nutty, popcorn, peanut            | 10    |
| <b>N-containing compounds (7)</b> |      |                        |         |            |                                   |       |
| N1                                | 502  | Trimethylamine         | 2.87    | Fishy      | fishy, oily, rancid               | 2.4   |
| N2                                | 755  | Pyrrole                | 130     | Nutty      | sweet, ethereal                   | 20000 |
| N3                                | 746  | Pyridine               | 115.3   | Fishy      | sour, fishy, ammoniacal           | 2000  |
| N4                                | 863  | 3-methyl-Pyridine      | 144     | Green      | earthy, hazelnut, nutty           | -     |
| N5                                | 853  | 4-methyl-Pyrimidine    | -       | N.A.       | N.A.                              | -     |
| N6                                | 1027 | 3-propyl-Pyridine      | -       | Beany      | sweet, green, musty, earthy       | -     |
| N7                                | 1101 | 3-butyl-Pyridine       | -       | N.A.       | N.A.                              | -     |
| <b>Hydrocarbons (15)</b>          |      |                        |         |            |                                   |       |
| H1                                | 600  | Hexane                 | 69      | N.A.       | N.A.                              | 1500  |
| H2                                | 700  | Heptane                | 98      | N.A.       | N.A.                              | 50000 |
| H3                                | 800  | Octane                 | 125-127 | N.A.       | N.A.                              | 10000 |
| H4                                | 900  | Nonane                 | 151.66  | N.A.       | alkane, gasoline                  | 10000 |
| H5                                | 1100 | Undecane               | 196.28  | N.A.       | N.A.                              | 1170  |
| H6                                | 685  | 1-Heptene              | 94      | N.A.       | N.A.                              | -     |
| H7                                | 691  | (Z)-3-Heptene          | 96      | N.A.       | N.A.                              | -     |
| H8                                | 789  | 1-Octene               | 121     | N.A.       | N.A.                              | 0.5   |

|                                    |      |                     |       |          |                            |       |
|------------------------------------|------|---------------------|-------|----------|----------------------------|-------|
| H9                                 | 810  | 2-Octene            | 125.2 | N.A.     | N.A.                       | -     |
| H10                                | 889  | 1-Nonene            | 146.9 | N.A.     | N.A.                       | -     |
| H11                                | 885  | cis-4-Nonene        | 143   | N.A.     | N.A.                       | -     |
| H12                                | 989  | 1-Decene            | 169   | N.A.     | N.A.                       | -     |
| H13                                | 1097 | (E)-2-Undecene      | -     | N.A.     | N.A.                       | -     |
| H14                                | 523  | 1,3-Pentadiene      | 42    | N.A.     | N.A.                       | 2500  |
| H15                                | 1018 | D-Limonene          | 176   | Citrus   | orange, fresh, sweet       | 10    |
| <b>Miscellaneous compounds (5)</b> |      |                     |       |          |                            |       |
| M1                                 | 700  | Propanoic acid      | 141.1 | Acidic   | pungent, acidic, cheesy    | 2190  |
| M2                                 | 1273 | Nonanoic acid       | 255.6 | Waxy     | waxy, dirty, cheesy, dairy | 4600  |
| M3                                 | 1475 | Undecanoic acid     | 283.3 | Waxy     | creamy, cheesy, fatty      | 10000 |
| M4                                 | 612  | Ethyl Acetate       | 77.2  | Ethereal | fruity, sweet, weedy       | 5     |
| M5                                 | 1045 | 2-Heptanol, acetate | -     | Brown    | fatty, fruity, green       | -     |

N.A. means not available.

a Retention index on DB-5MS column (compared with the RI in the literature).

b Odor types are mainly gathered from the website database.

(<http://www.thegoodscentscompany.com/index.html>)

c Odor descriptions and thresholds are mainly gathered from literature (Gu, Wang, Tao, & Wu, 2013) (Wu, Gu, Tao, Wang, & Ji, 2014) (Wang et al, 2016) (Wu, Wang, Tao, & Ni, 2016) (Zhuang et al, 2016)

**Table.S3.** The concentrations of volatile compounds were identified in edible parts of *E. sinensis* from three areas (μg/kg, n=3).

| Compound<br>ds        | Female-M                      |                             |                                 | Female-G                          |                             |                                   | Female-H                           |                              |                             | Male-M                             |                                   |                                    | Male-H                       |                                    |                                  |
|-----------------------|-------------------------------|-----------------------------|---------------------------------|-----------------------------------|-----------------------------|-----------------------------------|------------------------------------|------------------------------|-----------------------------|------------------------------------|-----------------------------------|------------------------------------|------------------------------|------------------------------------|----------------------------------|
|                       | SS                            | TS                          | TC                              | SS                                | TS                          | TC                                | SS                                 | TS                           | TC                          | SS                                 | TS                                | TC                                 | SS                           | TS                                 | TC                               |
| <b>Aldehydes (20)</b> |                               |                             |                                 |                                   |                             |                                   |                                    |                              |                             |                                    |                                   |                                    |                              |                                    |                                  |
| Pentanal              | -                             | -                           | -                               | -                                 | -                           | 67.90<br>±1.80 <sup>a</sup>       | -                                  | -                            | -                           | -                                  | -                                 | -                                  | -                            | 63.02±<br>3.07 <sup>a</sup>        | -                                |
| Hexanal               | -                             | -                           | 17.70<br>±0.0<br>2 <sup>c</sup> | -                                 | 285.12<br>±24.27<br>ab      | 96.38<br>±5.09 <sup>a</sup><br>bc | -                                  | 295.58<br>±2.01 <sup>a</sup> | -                           | 70.62<br>±5.37 <sup>a</sup><br>bc  | -                                 | 162.3<br>5±2.3<br>0 <sup>abc</sup> | -                            | 59.59±<br>2.63 <sup>bc</sup>       | 58.64<br>±0.1<br>8 <sup>bc</sup> |
| Heptanal              | -                             | -                           | -                               | 124.00<br>±10.1<br>6 <sup>a</sup> | 37.16±<br>1.50 <sup>b</sup> | -                                 | 101.0<br>7±2.8<br>4 <sup>a</sup>   | -                            | -                           | -                                  | -                                 | -                                  | -                            | -                                  | -                                |
| Octanal               | -                             | -                           | -                               | -                                 | -                           | 63.15<br>±5.43                    | -                                  | -                            | -                           | -                                  | -                                 | -                                  | -                            | -                                  | -                                |
| Nonanal               | 96.48±<br>2.97 <sup>abc</sup> | 99.39<br>±7.03 <sup>c</sup> | 20.09<br>±0.6<br>5 <sup>c</sup> | 271.95<br>±2.24 <sup>a</sup>      | 79.00±<br>4.26 <sup>c</sup> | 80.08<br>±1.13 <sup>b</sup><br>c  | 155.2<br>0±7.0<br>9 <sup>abc</sup> | 19.04±<br>1.35 <sup>c</sup>  | 51.87±<br>4.34 <sup>c</sup> | 115.1<br>8±7.7<br>6 <sup>abc</sup> | 96.56<br>±1.89 <sup>a</sup><br>bc | 268.6<br>0±3.8<br>0 <sup>ab</sup>  | -                            | 115.30<br>±3.60 <sup>a</sup><br>bc | 20.24<br>±0.3<br>6 <sup>c</sup>  |
| Decanal               | -                             | -                           | -                               | 248.48<br>±1.58 <sup>a</sup>      | 48.97±<br>1.35 <sup>b</sup> | 100.9<br>9±0.5<br>4 <sup>b</sup>  | -                                  | -                            | -                           | -                                  | -                                 | -                                  | -                            | -                                  | -                                |
| (E)-2-Pentenal        | -                             | -                           | -                               | -                                 | 4.49±0<br>.01               | -                                 | -                                  | -                            | -                           | -                                  | -                                 | -                                  | -                            | -                                  | -                                |
| (E)-2-Hexenal         | -                             | -                           | -                               | -                                 | -                           | -                                 | -                                  | -                            | -                           | -                                  | -                                 | -                                  | 311.66<br>±8.52 <sup>a</sup> | 161.90<br>±1.81 <sup>b</sup>       | -                                |
| (E)-2-Octenal         | -                             | -                           | -                               | -                                 | 6.08±0<br>.37 <sup>b</sup>  | -                                 | -                                  | -                            | 99.54±<br>3.81 <sup>a</sup> | -                                  | -                                 | -                                  | -                            | -                                  | -                                |

[illegible]

[illegible]



|                                 |                              |                                   |   |                              |                             |                                  |                                  |   |                              |                                  |                                   |                             |                              |                              |   |
|---------------------------------|------------------------------|-----------------------------------|---|------------------------------|-----------------------------|----------------------------------|----------------------------------|---|------------------------------|----------------------------------|-----------------------------------|-----------------------------|------------------------------|------------------------------|---|
| 6-methyl-<br>5-Hepten-<br>2-one | 146.07<br>±0.57 <sup>a</sup> | 90.55<br>±12.4<br>5 <sup>ab</sup> | - | -                            | -                           | -                                | -                                | - | -                            | -                                | 110.1<br>0±2.2<br>2 <sup>ab</sup> | 21.30<br>±0.30 <sup>b</sup> | -                            | -                            | - |
| 5-methyl-<br>2-<br>Hexanone     | 15.17±<br>0.14               | -                                 | - | -                            | -                           | -                                | -                                | - | -                            | -                                | -                                 | -                           | -                            | -                            | - |
| <b>Alcohols (14)</b>            |                              |                                   |   |                              |                             |                                  |                                  |   |                              |                                  |                                   |                             |                              |                              |   |
| 1-<br>Pentanol                  | -                            | -                                 | - | 260.80<br>±2.79 <sup>a</sup> | 21.60±<br>0.84 <sup>a</sup> | 163.0<br>8±1.5<br>7 <sup>a</sup> | 367.1<br>8±3.6<br>5 <sup>a</sup> | - | -                            | -                                | -                                 | -                           | -                            | -                            | - |
| 1-Hexanol                       | -                            | -                                 | - | -                            | -                           | 226.5<br>9±2.2<br>5 <sup>a</sup> | 267.9<br>7±1.2<br>5 <sup>a</sup> | - | -                            | -                                | -                                 | -                           | -                            | 133.27<br>±2.09 <sup>a</sup> | - |
| 1-<br>Heptanol                  | -                            | -                                 | - | -                            | -                           | 274.8<br>3±8.7<br>6 <sup>a</sup> | -                                | - | -                            | 186.7<br>0±7.5<br>2 <sup>a</sup> | -                                 | -                           | -                            | -                            | - |
| 2-Octanol                       | -                            | -                                 | - | -                            | 0.79±0<br>.00               | -                                | -                                | - | -                            | -                                | -                                 | -                           | -                            | -                            | - |
| 2-<br>Nonanol                   | 13.98±<br>0.06               | -                                 | - | -                            | -                           | -                                | -                                | - | -                            | -                                | -                                 | -                           | -                            | -                            | - |
| 2-<br>Undecano<br>l             | -                            | -                                 | - | 72.46<br>±7.94 <sup>a</sup>  | 28.37±<br>1.92 <sup>a</sup> | -                                | -                                | - | -                            | 17.52<br>±1.10 <sup>a</sup>      | -                                 | -                           | -                            | 40.84±<br>0.66 <sup>a</sup>  | - |
| 1-Penten-<br>3-ol               | 149.05<br>±2.78 <sup>b</sup> | -                                 | - | 305.50<br>±2.68 <sup>b</sup> | 82.43±<br>5.44 <sup>b</sup> | -                                | 770.8<br>5±2.9<br>3 <sup>a</sup> | - | 192.19<br>±1.29 <sup>b</sup> | -                                | -                                 | -                           | 169.92<br>±0.61 <sup>b</sup> | 109.55<br>±2.92 <sup>b</sup> | - |

|                        |                                      |                                     |                                  |                                    |                                      |                                     |                                     |                                      |                                      |                                    |                                     |                                     |                                      |                                     |                                  |
|------------------------|--------------------------------------|-------------------------------------|----------------------------------|------------------------------------|--------------------------------------|-------------------------------------|-------------------------------------|--------------------------------------|--------------------------------------|------------------------------------|-------------------------------------|-------------------------------------|--------------------------------------|-------------------------------------|----------------------------------|
| 3-Penten-1-ol          | -                                    | -                                   | -                                | -                                  | -                                    | -                                   | -                                   | -                                    | -                                    | 64.74<br>±2.31                     | -                                   | -                                   | -                                    | -                                   | -                                |
| (Z)-2-Penten-1-ol      | 55.43±<br>1.90 <sup>b</sup>          | -                                   | -                                | 1103.2<br>8±9.7<br>1 <sup>a</sup>  | 5.82±0<br>.40 <sup>b</sup>           | -                                   | -                                   | -                                    | -                                    | -                                  | 85.50<br>±5.30 <sup>b</sup>         | 47.91<br>±0.00 <sup>b</sup>         | 90.98±<br>0.44 <sup>b</sup>          | -                                   | -                                |
| 5-Hexen-2-ol           | 45.20±<br>3.01 <sup>a</sup>          | -                                   | -                                | -                                  | 4.02±0<br>.36 <sup>b</sup>           | -                                   | -                                   | -                                    | -                                    | -                                  | -                                   | -                                   | -                                    | -                                   | -                                |
| 1-Octen-3-ol           | -                                    | -                                   | -                                | 170.77<br>±1.25 <sup>a</sup>       | -                                    | -                                   | 70.27<br>±4.84 <sup>a</sup><br>b    | 29.68±<br>2.10 <sup>b</sup>          | -                                    | -                                  | -                                   | -                                   | -                                    | -                                   | -                                |
| (E)-2-Decen-1-ol       | 25.43±<br>0.19 <sup>a</sup>          | -                                   | -                                | -                                  | -                                    | -                                   | -                                   | -                                    | -                                    | -                                  | 4.65±<br>0.55 <sup>b</sup>          | -                                   | -                                    | -                                   | -                                |
| 2-ethyl-1-Hexanol      | -                                    | -                                   | -                                | -                                  | -                                    | -                                   | -                                   | -                                    | -                                    | -                                  | 148.4<br>7±1.4<br>7 <sup>a</sup>    | -                                   | -                                    | -                                   | 20.21<br>±0.8<br>4 <sup>b</sup>  |
| 2-methyl-1-Hexadecanol | 80.16±<br>0.86 <sup>b</sup>          | 203.6<br>4±6.2<br>3 <sup>b</sup>    | -                                | 628.97<br>±4.49 <sup>a</sup>       | -                                    | -                                   | 213.4<br>9±1.3<br>4 <sup>b</sup>    | -                                    | 37.97±<br>1.38 <sup>b</sup>          | -                                  | 52.94<br>±7.35 <sup>b</sup>         | -                                   | -                                    | -                                   | -                                |
| <b>Aromatics (12)</b>  |                                      |                                     |                                  |                                    |                                      |                                     |                                     |                                      |                                      |                                    |                                     |                                     |                                      |                                     |                                  |
| Benzene                | 2399.1<br>5±98.5<br>7 <sup>bcd</sup> | 6328.<br>16±42<br>.46 <sup>ab</sup> | 92.26<br>±12.<br>43 <sup>d</sup> | 9160.0<br>8±81.<br>01 <sup>a</sup> | 2986.9<br>2±18.5<br>2b <sup>cd</sup> | 1508.<br>65±91<br>.56 <sup>cd</sup> | 4863.<br>09±27<br>.57 <sup>bc</sup> | 2444.4<br>7±29.9<br>1 <sup>bcd</sup> | 3919.3<br>6±27.2<br>1 <sup>bcd</sup> | 1890.<br>43±6.<br>29 <sup>cd</sup> | 2006.<br>58±10<br>.77 <sup>cd</sup> | 2366.<br>88±17<br>.48 <sup>cd</sup> | 3481.3<br>0±15.0<br>8 <sup>bcd</sup> | 1839.1<br>0±81.1<br>3 <sup>cd</sup> | 264.2<br>1±5.<br>96 <sup>d</sup> |

|               |                               |                                           |                                        |                                          |                                          |                                         |                                           |                              |                              |                                          |                                          |                                         |                                           |                                          |                                        |
|---------------|-------------------------------|-------------------------------------------|----------------------------------------|------------------------------------------|------------------------------------------|-----------------------------------------|-------------------------------------------|------------------------------|------------------------------|------------------------------------------|------------------------------------------|-----------------------------------------|-------------------------------------------|------------------------------------------|----------------------------------------|
| Toluene       | 801.36<br>±39.36 <sup>c</sup> | 1161.<br>33±82 <sup>.85<sup>c</sup></sup> | 90.43<br>±7.4 <sup>6<sup>c</sup></sup> | 7332.9<br>7±6.8 <sup>6<sup>a</sup></sup> | 626.57<br>±23.75 <sup>c</sup>            | 522.0<br>4±2.7 <sup>0<sup>c</sup></sup> | 3991.<br>13±22 <sup>.85<sup>b</sup></sup> | 243.21<br>±7.93 <sup>c</sup> | 430.45<br>±2.97 <sup>c</sup> | 372.4<br>4±1.8 <sup>6<sup>c</sup></sup>  | 453.6<br>6±1.1 <sup>4<sup>c</sup></sup>  | 557.6<br>9±4.6 <sup>0<sup>c</sup></sup> | 918.56<br>±2.34 <sup>c</sup>              | 690.52<br>±63.47 <sup>c</sup>            | 72.50<br>±0.8 <sup>1<sup>c</sup></sup> |
| Ethylbenzene  | 72.49±<br>1.52 <sup>c</sup>   | -                                         | -                                      | 556.15<br>±4.98 <sup>a</sup>             | 95.40±<br>4.51 <sup>c</sup>              | 53.74<br>±7.60 <sup>c</sup>             | 312.4<br>9±1.6 <sup>7<sup>b</sup></sup>   | 20.38±<br>1.44 <sup>c</sup>  | 90.05±<br>5.23 <sup>c</sup>  | 89.71<br>±1.27 <sup>c</sup>              | 190.0<br>4±3.5 <sup>2<sup>bc</sup></sup> | 8.78±<br>0.12 <sup>c</sup>              | 212.64<br>±2.04 <sup>b<sub>c</sub></sup>  | 109.39<br>±7.02 <sup>b<sub>c</sub></sup> | -                                      |
| p-Xylene      | 73.85±<br>1.84 <sup>b</sup>   | -                                         | -                                      | 915.66<br>±8.04 <sup>a</sup>             | 77.84±<br>3.45 <sup>b</sup>              | 84.67<br>±11.9 <sup>7<sup>b</sup></sup> | 283.9<br>8±9.5 <sup>9<sup>b</sup></sup>   | 46.11±<br>3.26 <sup>b</sup>  | 115.00<br>±8.05 <sup>b</sup> | 38.62<br>±2.45 <sup>b</sup>              | -                                        | -                                       | 279.79<br>±7.29 <sup>b</sup>              | 112.71<br>±5.74 <sup>b</sup>             | -                                      |
| o-Xylene      | -                             | -                                         | -                                      | 455.73<br>±4.16 <sup>a<sub>b</sub></sup> | 194.45<br>±3.52 <sup>b</sup>             | -                                       | 632.9<br>0±2.0 <sup>6<sup>a</sup></sup>   | -                            | -                            | -                                        | -                                        | -                                       | 263.49<br>±12.00 <sup>b</sup>             | -                                        | -                                      |
| Styrene       | 93.66±<br>1.44 <sup>cd</sup>  | -                                         | -                                      | 352.84<br>±2.81 <sup>a</sup>             | 117.06<br>±1.46 <sup>c<sub>d</sub></sup> | 43.54<br>±3.17 <sup>c<sub>d</sub></sup> | 259.1<br>0±9.6 <sup>3<sup>ab</sup></sup>  | -                            | 84.27±<br>1.73 <sup>cd</sup> | 33.70<br>±1.14 <sup>d</sup>              | 179.7<br>8±2.0 <sup>0<sup>bc</sup></sup> | -                                       | 169.77<br>±2.21 <sup>b<sub>cd</sub></sup> | 87.98±<br>6.54 <sup>cd</sup>             | -                                      |
| Propylbenzene | 48.22±<br>1.28 <sup>b</sup>   | -                                         | -                                      | 168.96<br>±1.62 <sup>a</sup>             | 36.86±<br>2.51 <sup>b</sup>              | -                                       | 138.2<br>6±4.9 <sup>1<sup>ab</sup></sup>  | -                            | 61.60±<br>1.40 <sup>b</sup>  | 94.58<br>±4.01 <sup>a<sub>b</sub></sup>  | -                                        | -                                       | -                                         | -                                        | -                                      |
| Butylbenzene  | 47.53±<br>0.20 <sup>b</sup>   | -                                         | -                                      | 147.82<br>±1.26 <sup>a</sup>             | 25.90±<br>1.70 <sup>b</sup>              | 55.23<br>±2.20 <sup>b</sup>             | -                                         | -                            | -                            | 96.52<br>±6.05 <sup>a<sub>b</sub></sup>  | 56.10<br>±0.35 <sup>b</sup>              | -                                       | -                                         | -                                        | -                                      |
| Pentylbenzene | 34.43±<br>0.51 <sup>bc</sup>  | -                                         | -                                      | 195.76<br>±1.50 <sup>a</sup>             | 19.82±<br>0.45 <sup>c</sup>              | 71.20<br>±4.56 <sup>b<sub>c</sub></sup> | -                                         | -                            | -                            | 111.9<br>1±5.3 <sup>2<sup>ab</sup></sup> | 70.13<br>±2.23 <sup>b<sub>c</sub></sup>  | -                                       | 72.43±<br>1.87 <sup>bc</sup>              | -                                        | -                                      |

|                                    |                                           |                                |                             |                               |                                 |                                |                                |                              |                                            |                               |                               |                               |                                |                                  |                               |
|------------------------------------|-------------------------------------------|--------------------------------|-----------------------------|-------------------------------|---------------------------------|--------------------------------|--------------------------------|------------------------------|--------------------------------------------|-------------------------------|-------------------------------|-------------------------------|--------------------------------|----------------------------------|-------------------------------|
| Benzaldehyde                       | 331.43<br>±4.57 <sup>c</sup> <sub>d</sub> | 548.5<br>9±38.40 <sup>cd</sup> | 62.20<br>±0.26 <sup>d</sup> | 3717.0<br>7±3.01 <sup>a</sup> | 882.67<br>±38.62 <sub>bcd</sub> | 774.1<br>8±5.16 <sup>bcd</sup> | 1422.<br>98±5.33 <sup>bc</sup> | 132.52<br>±6.60 <sup>d</sup> | 770.40<br>±4.04 <sup>b</sup> <sub>cd</sub> | 622.7<br>6±2.39 <sup>cd</sup> | 262.6<br>2±4.36 <sup>cd</sup> | 385.4<br>3±3.21 <sup>cd</sup> | 1909.7<br>2±45.99 <sup>b</sup> | 1027.5<br>7±30.24 <sup>bcd</sup> | 279.3<br>8±0.94 <sup>cd</sup> |
| 1,2,4-trimethyl-Benzene            | -                                         | -                              | -                           | 211.57<br>±1.63               | -                               | -                              | -                              | -                            | -                                          | -                             | -                             | -                             | -                              | -                                | -                             |
| Naphthalene                        | 399.30<br>±2.30 <sup>b</sup>              | -                              | -                           | 1177.0<br>5±0.54 <sup>a</sup> | -                               | -                              | -                              | -                            | -                                          | -                             | 245.6<br>2±7.57 <sup>b</sup>  | 204.2<br>6±1.20 <sup>b</sup>  | 426.36<br>±0.70 <sup>b</sup>   | -                                | -                             |
| <b>Furans (3)</b>                  |                                           |                                |                             |                               |                                 |                                |                                |                              |                                            |                               |                               |                               |                                |                                  |                               |
| 3-methyl-Furan                     | -                                         | -                              | -                           | -                             | -                               | 42.78<br>±2.14                 | -                              | -                            | -                                          | -                             | -                             | -                             | -                              | -                                | -                             |
| Furfural                           | -                                         | -                              | -                           | 448.92<br>±3.21 <sup>a</sup>  | 33.03±<br>2.24 <sup>b</sup>     | -                              | 428.1<br>6±2.62 <sup>a</sup>   | -                            | -                                          | -                             | -                             | -                             | -                              | -                                | -                             |
| 2-Furanmethanol                    | 261.72<br>±4.53 <sup>b</sup>              | -                              | -                           | 713.79<br>±2.71 <sup>a</sup>  | 105.41<br>±8.45 <sup>b</sup>    | -                              | 684.2<br>9±3.68 <sup>a</sup>   | -                            | -                                          | -                             | -                             | -                             | -                              | -                                | -                             |
| <b>S-containing compounds (12)</b> |                                           |                                |                             |                               |                                 |                                |                                |                              |                                            |                               |                               |                               |                                |                                  |                               |
| Propyl mercaptan                   | -                                         | -                              | -                           | -                             | -                               | -                              | -                              | -                            | -                                          | 24.08<br>±0.91 <sup>a</sup>   | -                             | 19.77<br>±0.28 <sup>a</sup>   | -                              | -                                | -                             |
| 1-Nonanethiol                      | -                                         | -                              | -                           | -                             | -                               | -                              | -                              | -                            | -                                          | -                             | -                             | -                             | -                              | 369.10<br>±14.54                 | -                             |

[illegible]

|                                   |                                               |                                     |                                   |                                     |                                               |                                  |                                     |                                              |                                               |                                     |                                     |                                    |                                              |                                   |                                  |
|-----------------------------------|-----------------------------------------------|-------------------------------------|-----------------------------------|-------------------------------------|-----------------------------------------------|----------------------------------|-------------------------------------|----------------------------------------------|-----------------------------------------------|-------------------------------------|-------------------------------------|------------------------------------|----------------------------------------------|-----------------------------------|----------------------------------|
| Thiazole                          | -                                             | -                                   | -                                 | -                                   | -                                             | -                                | -                                   | 11.78±<br>0.83 <sup>b</sup>                  | -                                             | -                                   | -                                   | -                                  | 168.22<br>±0.88 <sup>a</sup>                 | -                                 | -                                |
| 2-Acetylthiazole                  | 234.53<br>±2.10 <sup>b</sup><br><sup>c</sup>  | 510.3<br>1±44.<br>11 <sup>a</sup>   | 20.54<br>±1.0<br>1 <sup>c</sup>   | -                                   | -                                             | -                                | 457.8<br>0±2.7<br>5 <sup>ab</sup>   | 108.33<br>±0.98 <sup>c</sup>                 | -                                             | 181.6<br>9±7.7<br>0 <sup>c</sup>    | 92.61<br>±0.04 <sup>c</sup>         | 272.0<br>5±1.8<br>4 <sup>abc</sup> | -                                            | -                                 | 35.57<br>±0.8<br>0 <sup>c</sup>  |
| <b>N-containing compounds (7)</b> |                                               |                                     |                                   |                                     |                                               |                                  |                                     |                                              |                                               |                                     |                                     |                                    |                                              |                                   |                                  |
| Trimethylamine                    | 1908.8<br>7±55.8<br>6 <sup>cd</sup>           | 3632.<br>89±33<br>.14 <sup>ab</sup> | 307.2<br>5±4.<br>26 <sup>de</sup> | 2354.8<br>7±18.<br>30 <sup>bc</sup> | 159.43<br>±17.91<br><sup>e</sup>              | 186.7<br>5±6.9<br>7 <sup>e</sup> | 1846.<br>32±7.<br>13 <sup>cde</sup> | 434.37<br>±1.59 <sup>d</sup><br><sup>e</sup> | 811.50<br>±2.62 <sup>c</sup><br><sup>de</sup> | 1368.<br>15±7.<br>41 <sup>cde</sup> | 1108.<br>19±6.<br>55 <sup>cde</sup> | 4763.<br>87±21<br>.09 <sup>a</sup> | 1349.9<br>7±1.88<br><sup>cde</sup>           | 651.59<br>±29.58<br><sup>de</sup> | 176.5<br>4±9.<br>05 <sup>e</sup> |
| Pyrrole                           | -                                             | -                                   | -                                 | -                                   | -                                             | -                                | -                                   | 13.05±<br>1.16                               | -                                             | -                                   | -                                   | -                                  | -                                            | -                                 | -                                |
| Pyridine                          | 107.78<br>±8.47 <sup>b</sup><br><sup>cd</sup> | -                                   | -                                 | 362.64<br>±3.43 <sup>a</sup>        | 115.14<br>±4.86 <sup>b</sup><br><sup>cd</sup> | 23.94<br>±1.17 <sup>d</sup>      | 227.9<br>3±8.1<br>6 <sup>abc</sup>  | -                                            | 59.38±<br>3.35 <sup>cd</sup>                  | -                                   | -                                   | 32.40<br>±0.46 <sup>d</sup>        | 259.43<br>±0.11 <sup>a</sup><br><sup>b</sup> | -                                 | -                                |
| 3-methyl-Pyridine                 | 33.28±<br>1.27 <sup>b</sup>                   | -                                   | -                                 | 388.97<br>±2.89 <sup>a</sup>        | -                                             | -                                | 138.2<br>4±7.3<br>5 <sup>b</sup>    | -                                            | -                                             | -                                   | -                                   | -                                  | 214.69<br>±5.32 <sup>a</sup><br><sup>b</sup> | -                                 | -                                |
| 4-methyl-Pyrimidine               | 68.59±<br>0.33                                | -                                   | -                                 | -                                   | -                                             | -                                | -                                   | -                                            | -                                             | -                                   | -                                   | -                                  | -                                            | -                                 | -                                |
| 3-propyl-Pyridine                 | -                                             | -                                   | -                                 | -                                   | -                                             | -                                | 210.1<br>6±1.9<br>2 <sup>a</sup>    | -                                            | -                                             | -                                   | -                                   | -                                  | 177.36<br>±10.58<br><sup>a</sup>             | -                                 | -                                |
| 3-butyl-Pyridine                  | 105.67<br>±2.45 <sup>b</sup>                  | -                                   | -                                 | 268.66<br>±1.57 <sup>a</sup>        | -                                             | -                                | -                                   | -                                            | -                                             | -                                   | -                                   | -                                  | 207.42<br>±9.26 <sup>a</sup><br><sup>b</sup> | -                                 | -                                |

# Hydrocarbons (15)

|               |                    |                    |                |                    |                      |                    |                  |                    |                    |                     |                                  |                                 |                    |                    |                               |
|---------------|--------------------|--------------------|----------------|--------------------|----------------------|--------------------|------------------|--------------------|--------------------|---------------------|----------------------------------|---------------------------------|--------------------|--------------------|-------------------------------|
|               | 1537.5             | 6290.              | 85.30          | 18615.             | 2332.7               | 751.6              | 7334.            |                    | 1465.3             | 810.3               | 1772.                            | 821.2                           | 2810.7             | 597.31             | 83.67                         |
| Hexane        | 0±19.2             | 77±38              | ±3.6           | 82±17              | 0±112.               | 7±3.4              | 66±22            | 170.43             | 4±7.91             | 3±3.3               | 86±3.                            | 4±5.1                           | 4±1.95             | ±40.21             | ±1.7                          |
|               | 8 <sup>bc</sup>    | .93 <sup>bc</sup>  | 3 <sup>c</sup> | .21 <sup>a</sup>   | 53 <sup>bc</sup>     | 3 <sup>bc</sup>    | .11 <sup>b</sup> | ±1.55 <sup>c</sup> | <sup>bc</sup>      | 8 <sup>bc</sup>     | 67 <sup>bc</sup>                 | 0 <sup>bc</sup>                 | <sup>bc</sup>      | <sup>c</sup>       | 5 <sup>c</sup>                |
| Heptane       | 226.73             | -                  | -              | 934.82             | 367.81               | 56.05              | 956.3            | 40.12±             | 68.45±             | 57.70               | 237.5                            |                                 | 300.15             | 42.02±             | -                             |
|               | ±4.55 <sup>b</sup> |                    |                | ±8.38 <sup>a</sup> | ±17.23 <sup>b</sup>  | ±3.24 <sup>b</sup> | 5±3.0            | 2.84 <sup>b</sup>  | 4.84 <sup>b</sup>  | ±1.18 <sup>b</sup>  | 0±1.0 <sup>4<sup>b</sup></sup>   | -                               | ±3.41 <sup>b</sup> | 1.51 <sup>b</sup>  | -                             |
| Octane        | 221.10             | 303.1              | 4.49           | 713.59             | 441.40               | 64.66              | 841.6            | 83.84±             | 74.31±             | 71.69               | 268.0                            | 117.0                           | 408.73             | 65.02±             | 14.14                         |
|               | ±5.02 <sup>c</sup> | 3±25.              | ±0.1           | ±6.14 <sup>a</sup> | ±20.66 <sup>bc</sup> | ±3.96 <sup>d</sup> | 1±2.8            | 0.20 <sup>de</sup> | 2.92 <sup>de</sup> | ±3.11 <sup>de</sup> | 0±1.0 <sup>5<sup>cde</sup></sup> | 8±0.6 <sup>5<sup>de</sup></sup> | ±4.99 <sup>c</sup> | 0.69 <sup>de</sup> | ±0.0 <sup>3<sup>e</sup></sup> |
|               | <sup>de</sup>      | 40 <sup>cd</sup>   | 5 <sup>e</sup> | <sup>b</sup>       | <sup>bc</sup>        | <sup>e</sup>       | 3 <sup>a</sup>   |                    |                    |                     |                                  |                                 |                    |                    |                               |
| Nonane        | -                  | -                  | -              | -                  | 674.41               | -                  | -                | -                  | -                  | -                   | -                                | -                               | 737.44             | -                  | -                             |
|               |                    |                    |                |                    | ±30.76 <sup>a</sup>  |                    |                  |                    |                    |                     |                                  |                                 | ±6.01 <sup>a</sup> |                    |                               |
| Undecane      | 196.29             | 278.6              |                | 907.47             | -                    | 87.29              | 626.1            |                    | 50.34±             | 77.57               |                                  |                                 | 265.78             | -                  | -                             |
|               | ±4.47 <sup>b</sup> | 6±25.              | -              | ±8.31 <sup>a</sup> |                      | ±5.07 <sup>c</sup> | 9±3.6            | -                  | 1.33 <sup>c</sup>  | ±5.87 <sup>c</sup>  | -                                | -                               | ±1.35 <sup>b</sup> | -                  | -                             |
|               | <sup>c</sup>       | 90 <sup>bc</sup>   |                |                    |                      |                    | 5 <sup>ab</sup>  |                    |                    |                     |                                  |                                 | <sup>c</sup>       |                    |                               |
| 1-Heptene     | 39.02±             | -                  | -              | 124.13             | 26.58±               | 51.19              | 177.1            |                    |                    | 78.16               | 24.87                            | 11.09                           | 42.77±             | 24.35±             | -                             |
|               | 0.80 <sup>cd</sup> |                    |                | ±5.07 <sup>b</sup> | 2.54 <sup>d</sup>    | ±3.73 <sup>c</sup> | 3±5.9            | -                  | -                  | ±4.58 <sup>bc</sup> | ±1.17 <sup>d</sup>               | ±0.16 <sup>d</sup>              | 1.29 <sup>cd</sup> | 1.13 <sup>d</sup>  | -                             |
|               |                    |                    |                |                    |                      | <sup>d</sup>       | 9 <sup>a</sup>   |                    |                    |                     |                                  |                                 |                    |                    |                               |
| (Z)-3-Heptene | -                  | -                  | -              | -                  | -                    | 7.75±              | -                | -                  | -                  | -                   | -                                | -                               | -                  | -                  | -                             |
|               |                    |                    |                |                    |                      | 0.34               |                  |                    |                    |                     |                                  |                                 |                    |                    |                               |
| 1-Octene      | -                  | -                  | -              | -                  | -                    | 20.81              | -                | -                  | -                  | -                   | -                                | -                               | -                  | -                  | -                             |
|               |                    |                    |                |                    |                      | ±2.05              |                  |                    |                    |                     |                                  |                                 |                    |                    |                               |
| 2-Octene      | -                  | 97.88              |                | 163.33             | 34.79±               | 67.16              | 195.2            | 22.03±             |                    |                     | 37.49                            | 120.4                           | 22.55±             | 45.80±             | -                             |
|               |                    | ±5.24 <sup>b</sup> | -              | ±1.46 <sup>a</sup> | 2.50 <sup>cd</sup>   | ±3.98 <sup>b</sup> | 1±1.1            | 0.17 <sup>d</sup>  | -                  | -                   | ±2.72 <sup>c</sup>               | 3±0.8                           | 0.29 <sup>d</sup>  | 1.29 <sup>cd</sup> | -                             |
|               |                    | <sup>cd</sup>      |                | <sup>b</sup>       |                      | <sup>cd</sup>      | 6 <sup>a</sup>   |                    |                    |                     | <sup>d</sup>                     | 0 <sup>abc</sup>                |                    |                    |                               |

|                                    |   |                                  |                                 |                              |                              |                                  |                                  |                             |   |                                  |                                  |   |                             |                             |                                 |
|------------------------------------|---|----------------------------------|---------------------------------|------------------------------|------------------------------|----------------------------------|----------------------------------|-----------------------------|---|----------------------------------|----------------------------------|---|-----------------------------|-----------------------------|---------------------------------|
| 1-Nonene                           | - | -                                | -                               | 61.22<br>±1.62 <sup>a</sup>  | -                            | -                                | -                                | -                           | - | -                                | -                                | - | 59.61±<br>4.06 <sup>a</sup> | 35.40±<br>1.44 <sup>a</sup> | -                               |
| cis-4-Nonene                       | - | -                                | -                               | -                            | -                            | 22.25<br>±1.21                   | -                                | -                           | - | -                                | -                                | - | -                           | -                           | -                               |
| 1-Decene                           | - | -                                | -                               | -                            | 65.33±<br>4.79 <sup>a</sup>  | 112.6<br>6±6.1<br>9 <sup>a</sup> | -                                | -                           | - | 114.9<br>4±7.6<br>4 <sup>a</sup> | -                                | - | -                           | 78.59±<br>2.97 <sup>a</sup> | -                               |
| (E)-2-Undecene                     | - | -                                | -                               | -                            | 22.88±<br>1.86 <sup>a</sup>  | -                                | -                                | -                           | - | 48.41<br>±3.99 <sup>a</sup>      | -                                | - | -                           | -                           | -                               |
| 1,3-Pentadiene                     | - | -                                | -                               | -                            | -                            | -                                | 268.0<br>9±1.1<br>7 <sup>a</sup> | 35.52±<br>2.47 <sup>b</sup> | - | -                                | -                                | - | -                           | -                           | -                               |
| D-Limonene                         | - | 508.7<br>8±8.6<br>4 <sup>a</sup> | -                               | -                            | 104.24<br>±8.78 <sup>b</sup> | 55.44<br>±7.74 <sup>b</sup>      | -                                | -                           | - | 15.85<br>±0.61<br>b              | 450.2<br>5±8.0<br>7 <sup>a</sup> | - | -                           | -                           | -                               |
| <b>Miscellaneous compounds (5)</b> |   |                                  |                                 |                              |                              |                                  |                                  |                             |   |                                  |                                  |   |                             |                             |                                 |
| Propanoic acid                     | - | 228.3<br>7±9.5<br>7 <sup>a</sup> | 15.68<br>±0.0<br>2 <sup>c</sup> | -                            | -                            | -                                | -                                | -                           | - | -                                | 122.8<br>9±4.5<br>6 <sup>b</sup> | - | -                           | -                           | 11.40<br>±1.1<br>3 <sup>c</sup> |
| Nonanoic acid                      | - | -                                | -                               | -                            | -                            | -                                | -                                | -                           | - | 27.96<br>±3.47                   | -                                | - | -                           | -                           | -                               |
| Undecanoic acid                    | - | -                                | -                               | -                            | -                            | 255.6<br>7±6.0<br>6 <sup>a</sup> | -                                | -                           | - | 228.7<br>0±9.6<br>4 <sup>a</sup> | -                                | - | -                           | -                           | -                               |
| Ethyl Acetate                      | - | -                                | -                               | 547.21<br>±5.20 <sup>a</sup> | 28.68±<br>1.04 <sup>b</sup>  | -                                | -                                | -                           | - | -                                | 28.31<br>±1.92 <sup>b</sup>      | - | -                           | -                           | -                               |





|                                    |        |         |        |        |       |       |        |        |        |        |        |         |        |        |       |
|------------------------------------|--------|---------|--------|--------|-------|-------|--------|--------|--------|--------|--------|---------|--------|--------|-------|
| (E)-2-Undecenal                    | -      | -       | -      | -      | -     | -     | -      | -      | 125.04 | -      | -      | -       | -      | -      | -     |
| (E)-2-Dodecenal                    | -      | -       | -      | -      | -     | -     | -      | -      | -      | 67.16  | -      | -       | -      | 78.44  | -     |
| 2-methyl-Butanal                   | 163.43 | -       | 15.63  | 159.19 | 39.80 | -     | 439.04 | -      | -      | 81.20  | 17.50  | -       | 107.81 | -      | 38.34 |
| 3-methyl-Butanal                   | 153.15 | 341.89  | 28.07  | 287.74 | 64.47 | 62.01 | -      | 37.06  | -      | -      | 32.45  | 129.50  | 458.70 | -      | 94.15 |
| <b>Alcohols (4)</b>                |        |         |        |        |       |       |        |        |        |        |        |         |        |        |       |
| 1-Hexanol                          | -      | -       | -      | -      | -     | 40.46 | 47.85  | -      | -      | -      | -      | -       | -      | 23.80  | -     |
| 1-Heptanol                         | -      | -       | -      | -      | -     | 50.89 | -      | -      | -      | 34.57  | -      | -       | -      | -      | -     |
| (Z)-2-Penten-1-ol                  | -      | -       | -      | 12.37  | -     | -     | -      | -      | -      | -      | -      | -       | -      | -      | -     |
| 1-Octen-3-ol                       | -      | -       | -      | 113.85 | -     | -     | 46.85  | 19.79  | -      | -      | -      | -       | -      | -      | -     |
| <b>Aromatics (2)</b>               |        |         |        |        |       |       |        |        |        |        |        |         |        |        |       |
| Benzaldehyde                       | -      | 13.16   | -      | 89.14  | 21.17 | 18.57 | 34.12  | -      | 18.47  | 14.93  | -      | -       | 45.80  | 24.64  | -     |
| Naphthalene                        | -      | -       | -      | 19.62  | -     | -     | -      | -      | -      | -      | -      | -       | -      | -      | -     |
| <b>S-containing compounds (1)</b>  |        |         |        |        |       |       |        |        |        |        |        |         |        |        |       |
| 2-Acetylthiazole                   | 23.45  | 51.03   | -      | -      | -     | -     | 45.78  | 10.83  | -      | 18.17  | -      | 27.21   | -      | -      | -     |
| <b>N-containing compounds (1)</b>  |        |         |        |        |       |       |        |        |        |        |        |         |        |        |       |
| Trimethylamine                     | 795.36 | 1513.70 | 128.02 | 981.20 | 66.43 | 77.81 | 769.30 | 180.99 | 338.13 | 570.06 | 461.75 | 1984.95 | 562.49 | 271.50 | 73.56 |
| <b>Hydrocarbons (3)</b>            |        |         |        |        |       |       |        |        |        |        |        |         |        |        |       |
| Hexane                             | -      | -       | -      | 12.41  | -     | -     | -      | -      | -      | -      | -      | -       | -      | -      | -     |
| 1-Octene                           | -      | -       | -      | -      | -     | 41.62 | -      | -      | -      | -      | -      | -       | -      | -      | -     |
| D-Limonene                         | -      | 50.88   | -      | -      | 10.42 | -     | -      | -      | -      | -      | -      | -       | -      | -      | -     |
| <b>Miscellaneous compounds (1)</b> |        |         |        |        |       |       |        |        |        |        |        |         |        |        |       |
| Ethyl Acetate                      | -      | -       | -      | 109.44 | -     | -     | -      | -      | -      | -      | -      | -       | -      | -      | -     |

"-" indicates that the data was not detected.

M=Meat; G=Gonads; H= Hepatopancreas.

SS= Shanghai Baodao Aquaculture Professional Cooperative, Sea & River 21; TS= Taizhou Jiangyuan Animal Husbandry Co., Ltd., Sea & River 21; TC= Taizhou Jiangyuan Animal Husbandry Co., Ltd., Changjiang 2.
